# Supplementary material for: 2D Co-doped MnCr2O4 nanosheets as efficient bifunctional cathode materials for long-life Li–O2 batteries
Source: Royal Society of Chemistry journal article supplement (doi:10.1039/d3qi00771e), 2023-01-01
Supplement: d3qi00771e1.pdf [file d3qi00771e1.pdf]

## 2D Co-doped $\text{MnCr}_2\text{O}_4$ nanosheets as efficient bifunctional cathode materials for Long-Life $\text{Li-O}_2$ batteries

Yuting Zhu, Zhongxiao Wang, Jing Gao, Rui Sun, Lonwei Yin, Chengxiang Wang and Zhiwei Zhang\*

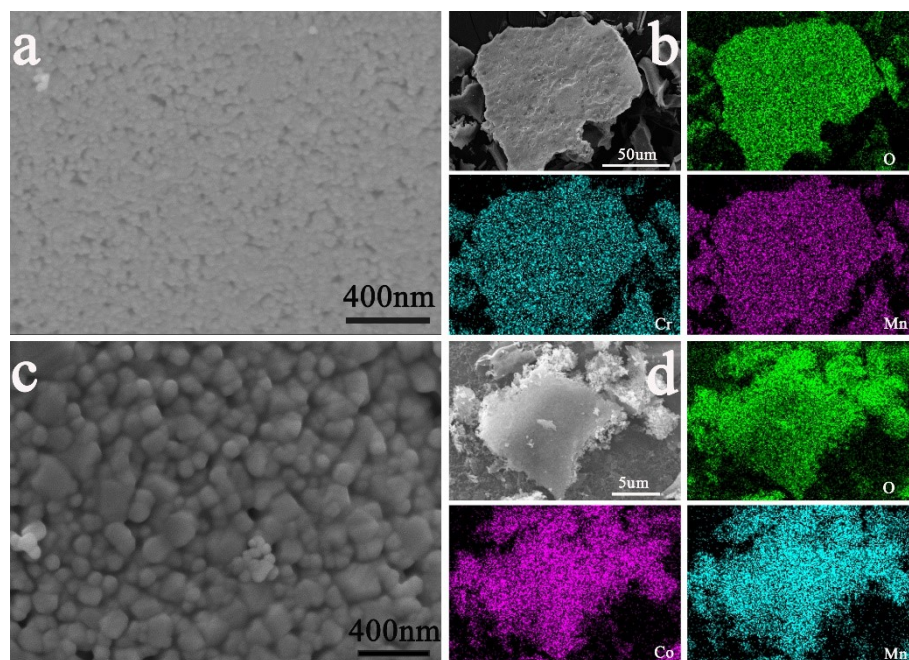

Fig. S1. (a, b) MnCrO and (c, d) MnCoO sample surface morphologies at high magnification and Mapping images.

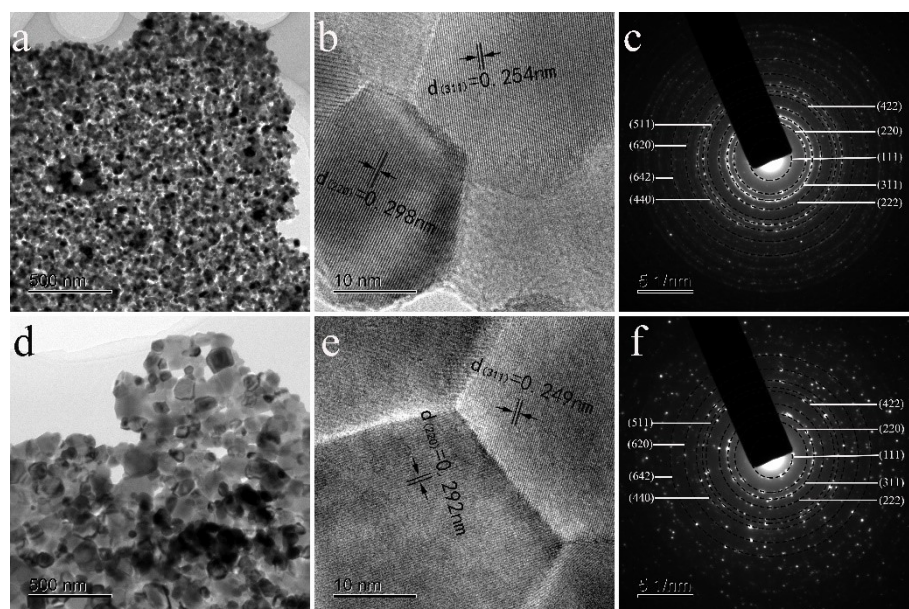

Fig. S2. (a-c) TEM, HRTEM images and electron diffraction patterns of MnCrO, respectively; (d-f) TEM, HRTEM images and electron diffraction patterns of MnCoO, respectively.

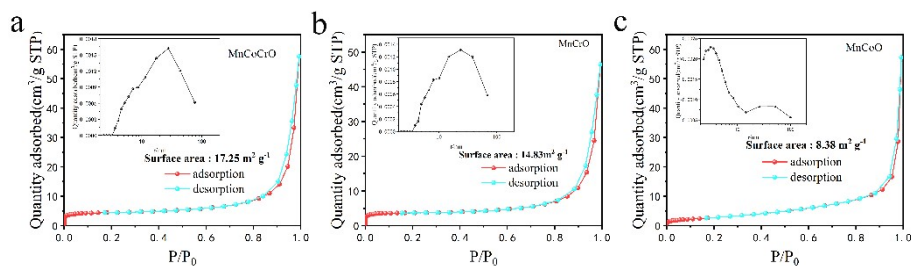

Fig. S3. N<sub>2</sub> adsorption and desorption isotherms and pore size distribution curves (inset) of (a) MnCoCrO, (b) MnCrO and (c) MnCoO.

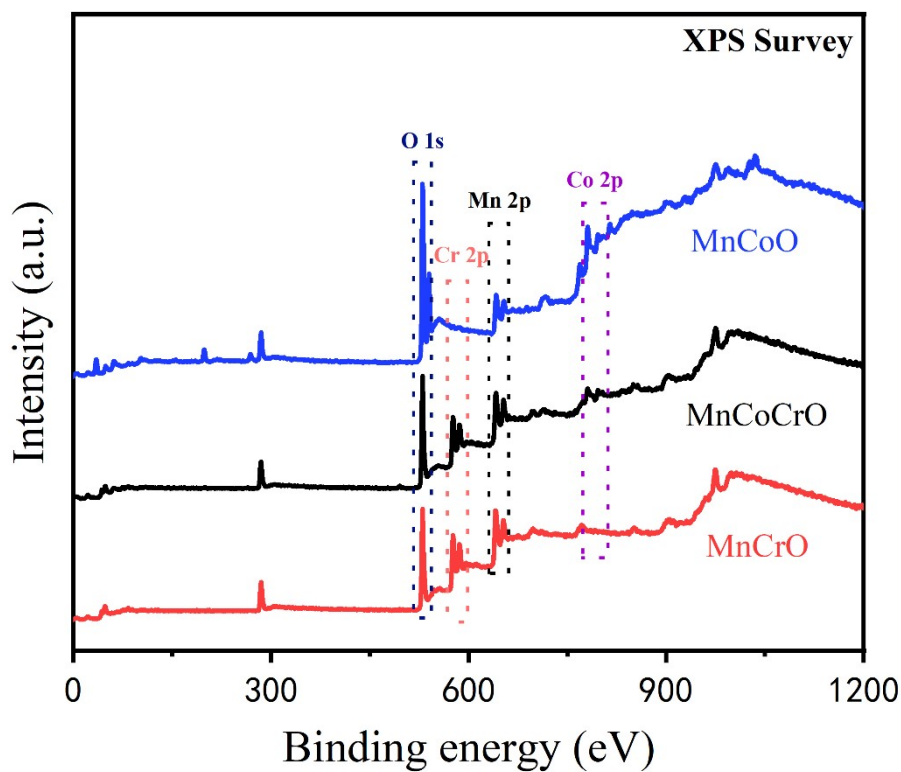

Fig. S4. XPS survey spectrum of MnCoCrO, MnCrO and MnCoO.

Table S1. Atomic surface concentration of MnCrO and MnCoCrO catalysts obtained with XPS.

| Catalysts | Surface atomic concentration (at%) |       |       |       |
|-----------|------------------------------------|-------|-------|-------|
|           | Co                                 | Mn    | Cr    | O     |
| MnCrO     | 0                                  | 10.79 | 20.98 | 68.24 |
| MnCoCrO   | 3.97                               | 10.58 | 17.93 | 67.52 |

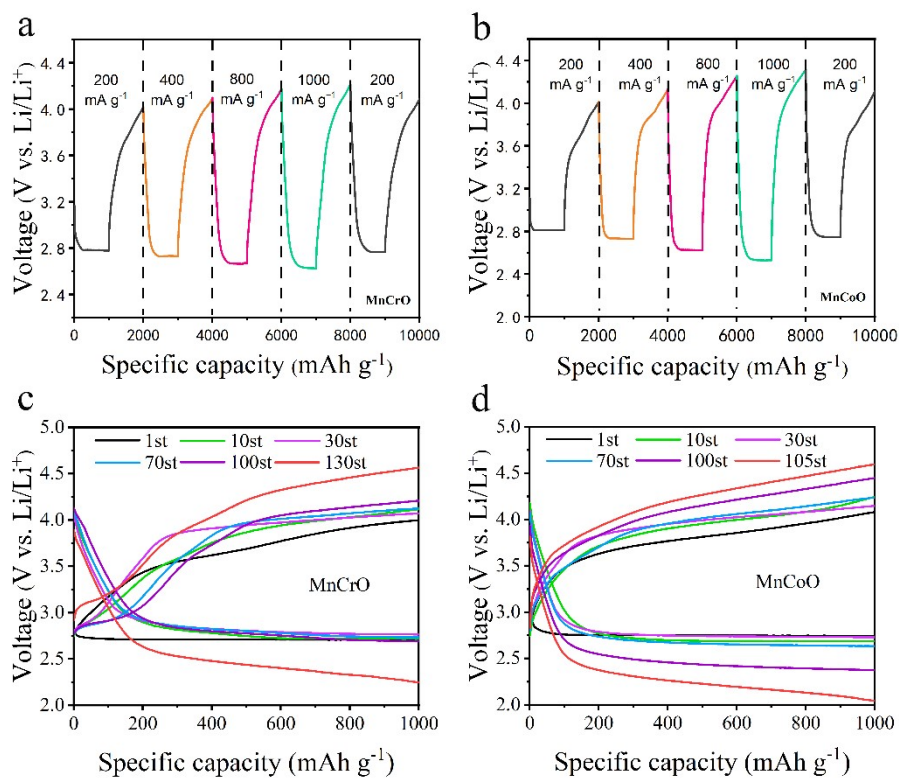

**Fig. S5.** The discharge–charge profiles of (a) MnCrO, (b) MnCoO-based electrode at various current densities ranging from 0.2 to 1.0 A g<sup>-1</sup> with a limited capacity of 1000 mAh g<sup>-1</sup>; Discharge–charge profiles of (c) MnCrO, (d) MnCoO-based electrode with different cycles at 400 mA g<sup>-1</sup>.

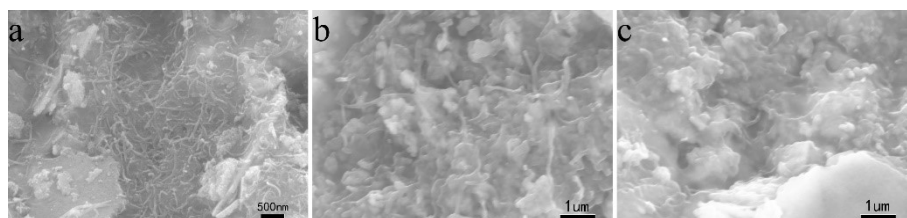

**Fig. S6.** Ex situ SEM images of recharged (a) MnCoCrO, (b) MnCrO, and (c) MnCoO-based electrodes with different magnifications.

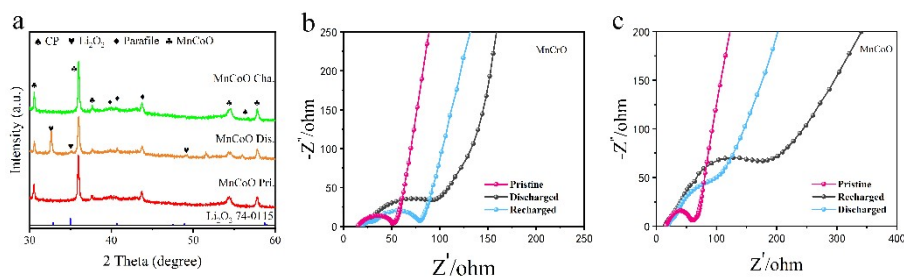

**Fig. S7.** (a) Ex-situ XRD patterns of discharged and charged MnCoO electrode; Nyquist plots of (b) MnCrO and (c) MnCoO electrodes at different discharge/charge stages.

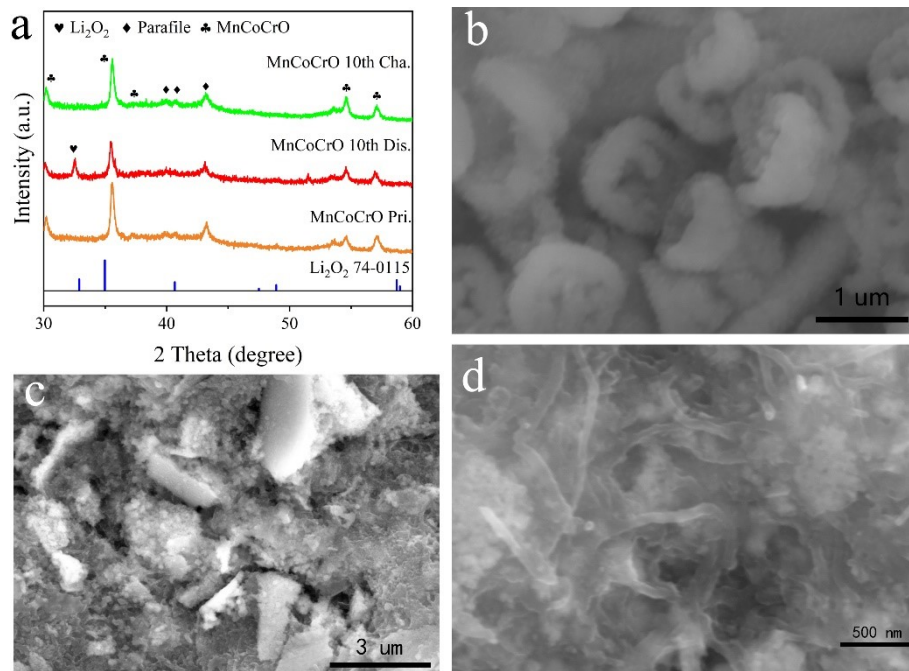

**Fig. S8.** (a) Ex-situ XRD of 10th cycle for MnCoCrO electrodes; Ex-situ SEM of 10th (b) discharge (c,d) charge for MnCoCrO electrode.

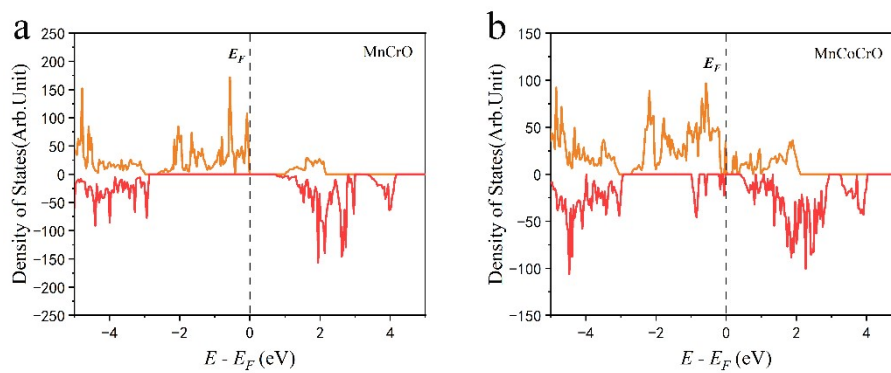

**Fig. S9.** (a-b) Computed density of states of MnCrO and MnCoCrO.
